# Supplementary material
Source: Springer Nature journal article supplement (https://www.springermedizin.de/resource/supplementary/12943_2009_574_MOESM16_ESM.pdf/9555012)

**A**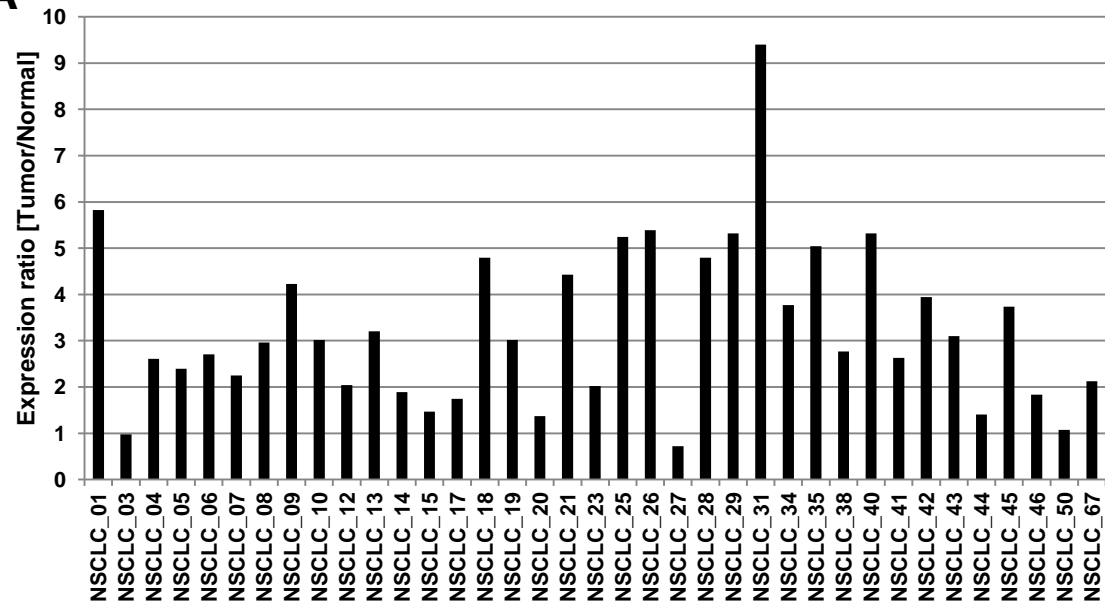**B**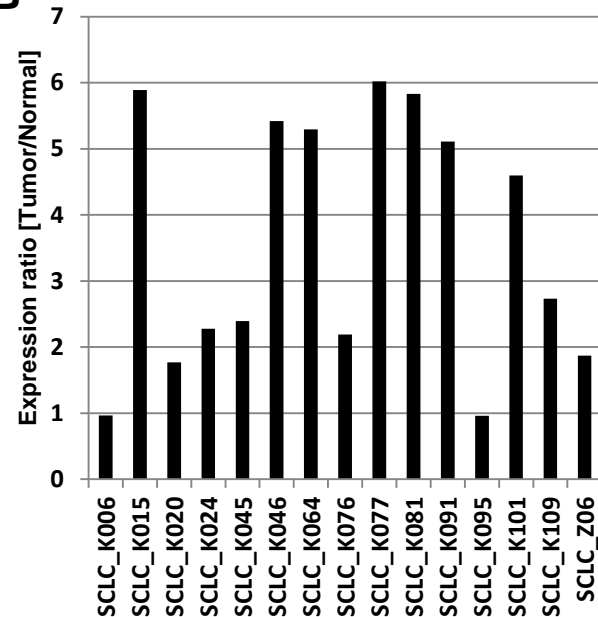**C**

NSCLC (Japanese case)

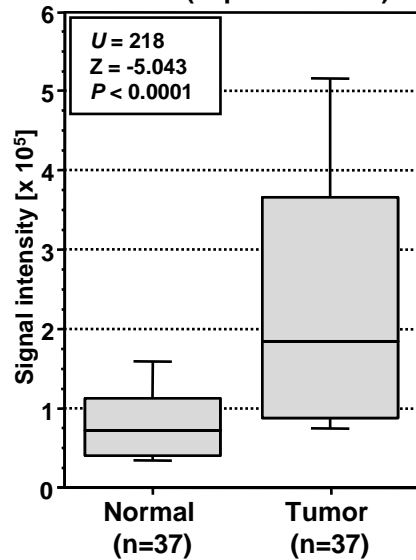**D**

SCLC (Japanese case)

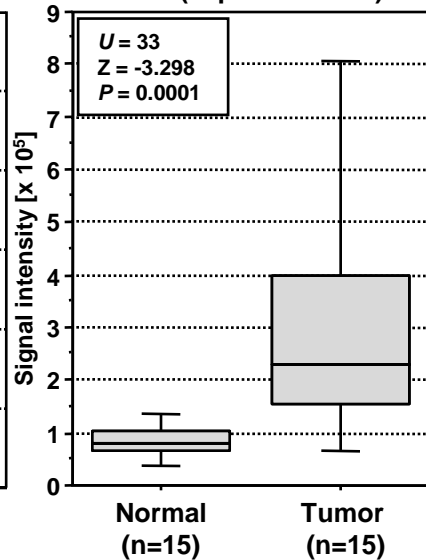**E**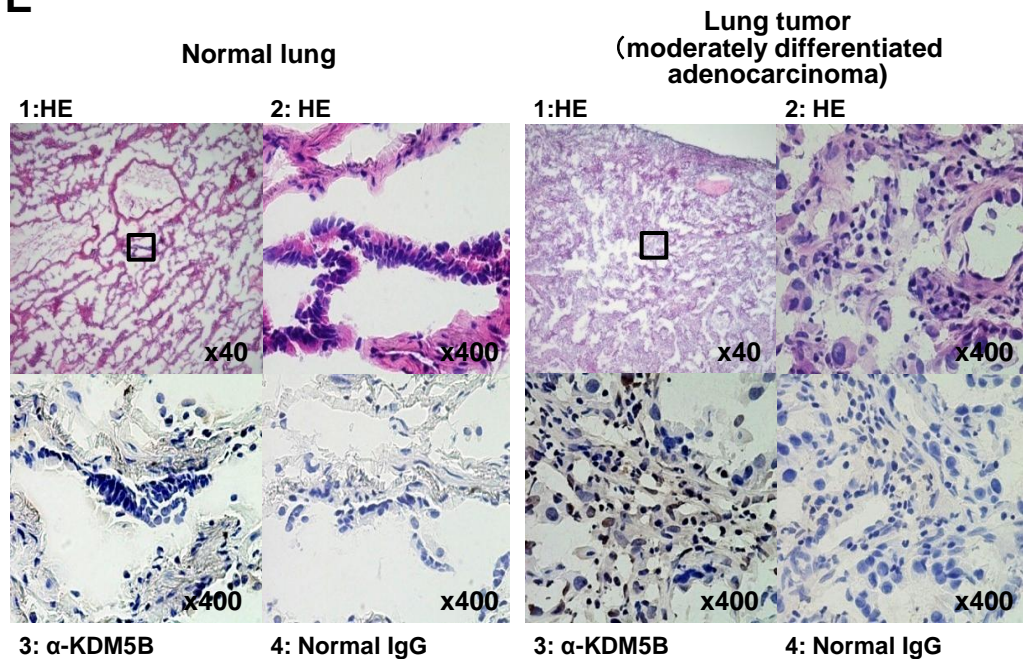

Supplement: MOESM16 [file 9555012]
